# Supplementary material
Source: publisher site journal article supplement (https://www.dovepress.com/get_supplementary_file.php?f=311774.docx)
Supplement: Supplementary file 1 [file get_supplementary_file.php]

Appendix 1. **Listing of diseases and comorbidities that comprise that Elixhauser and Functional Comorbidity Indices.**

Elixhauser Comorbidity Index

| **Disease/Comorbidity Number** | **Disease/Comorbidity** |
| --- | --- |
| 1 | Congestive heart failure |
| 2 | Cardiac Arrhythmia |
| 3 | Valvular disease |
| 4 | Pulmonary circulation disorders |
| 5 | Peripheral vascular disorders |
| 6 | Hypertension Uncomplicated |
| 7 | Hypertension Complicated |
| 8 | Paralysis |
| 9 | Other neurological disorders |
| 10 | Chronic pulmonary disease |
| 11 | Diabetes Uncomplicated |
| 12 | Diabetes Complicated |
| 13 | Hypothyroidism |
| 14 | Renal failure |
| 15 | Liver disease |
| 16 | Peptic ulcer disease excluding bleeding |
| 17 | AIDS/HIV |
| 18 | Lymphoma |
| 19 | Metastatic cancer |
| 20 | Solid tumor without Metastasis |
| 21 | Rheumatoid Arthritis/collagen |
| 22 | Coagulopathy |
| 23 | Obesity |
| 24 | Weight loss |
| 25 | Fluid and electrolyte disorders |
| 26 | Blood loss anemia |
| 27 | Deficiency anemia |
| 28 | Alcohol abuse |
| 29 | Drug abuse |
| 30 | Psychoses |
| 31 | Depression |

Functional Comorbidity Index

| **Disease/Comorbidity Number** | **Disease/Comorbidity** |
| --- | --- |
| 1 | Arthritis |
| 2 | Osteoporosis |
| 3 | Asthma |
| 4 | COPD |
| 5 | Angina |
| 6 | Congestive heart failure |
| 7 | Heart attack |
| 8 | Neurological disease |
| 9 | Stroke |
| 10 | Peripheral vascular disease |
| 11 | Diabetes Type I or II |
| 12 | Upper GI disease |
| 13 | Depression |
| 14 | Anxiety or panic disorders |
| 15 | Visual Impairment |
| 16 | Hearing Impairment |
| 17 | Degenerative Disc Disease |
| 18 | Obesity |

Appendix 2

**Table 1. Peri-operative complications where patient counts were ≤5 cases**

| **Perioperative complications** | **Open (n=2,388)** | **MIS (n=796)** |
| --- | --- | --- |
| Nutrition | 0.71% | 0.38% |
| Delirium | 0.34% | 0.00% |
| Unspecified Gastrointestinal (GI) | 0.29% | 0.13% |
| Dysphagia | 0.25% | 0.25% |
| Anastomosis | 0.21% | 0.00% |
| Device failure | 0.08% | 0.13% |
| General Infection | 0.08% | 0.00% |
| Pleural Effusion | 0.08% | 0.38% |
| Unspecified Urinary | 0.08% | 0.00% |
| Abdominal hernia | 0.04% | 0.00% |
| Infection sepsis | 0.04% | 0.00% |
| Myocardial infarction | 0.04% | 0.00% |
| Surgical injury | 0.04% | 0.25% |
| Thrombosis/Deep vein thrombosis (DVT) | 0.04% | 0.00% |
| Transient ischemic attack (TIA) | 0.04% | 0.00% |
| Infection pyelonephritis | 0.00% | 0.13% |
| Pneumothorax | 0.00% | 0.25% |
| Subcutaneous emphysema | 0.00% | 0.13% |
| Unspecified Respiratory | 0.00% | 0.13% |
